# Supplementary material
Source: PubMed Central journal article supplement (PMC11129240)

# 1. Information about cats in household

Please complete the following table for the cat you presented to the Community Practice Clinic today.

| Name of cat<br><i>(you can also assign a nick name or number)</i> | Age in years<br><i>(if younger than a year: age in months)</i> | Living in your home since what age? | Sex<br><i>Please circle one</i> | Neutered/spayed?<br><i>Please circle one</i> | Is your cat declawed?<br><i>Please circle one</i> | If declawed:<br><i>Please circle one</i> | If declawed: Was your cat declawed at time of neuter/spay?<br><i>Please circle one</i> | If declawed: Age at which declawed? | Lifestyle<br><i>Please circle one</i> |
|-------------------------------------------------------------------|----------------------------------------------------------------|-------------------------------------|---------------------------------|----------------------------------------------|---------------------------------------------------|------------------------------------------|----------------------------------------------------------------------------------------|-------------------------------------|---------------------------------------|
|                                                                   |                                                                |                                     | Male                            | Yes                                          | Yes                                               | front feet only                          | Yes                                                                                    |                                     | indoor                                |
|                                                                   |                                                                |                                     | Female                          | No                                           | No                                                | all four feet                            | No                                                                                     |                                     | indoor/outdoor<br>outdoor             |

If you have more than one cat, please fill out the following table for all other cats currently living in your home. If you have more than five cats, please fill out the table for the most recently acquired cats..

(Do not fill in data for deceased cats.)

| Name of cat<br><i>(you can also assign a nick name or number)</i> | Age in years<br><i>(if younger than a year: age in months)</i> | Living in your home since what age? | Sex    | Neutered/spayed? | Is your cat declawed? | If declawed:    | If declawed: Declawed at time of neuter/spay? | If declawed: Age at which declawed? | Lifestyle                 |
|-------------------------------------------------------------------|----------------------------------------------------------------|-------------------------------------|--------|------------------|-----------------------|-----------------|-----------------------------------------------|-------------------------------------|---------------------------|
|                                                                   |                                                                |                                     | Male   | Yes              | Yes                   | front feet only | Yes                                           |                                     | indoor                    |
|                                                                   |                                                                |                                     | Female | No               | No                    | all four feet   | No                                            |                                     | indoor/outdoor<br>outdoor |
|                                                                   |                                                                |                                     |        |                  |                       |                 |                                               |                                     |                           |
|                                                                   |                                                                |                                     |        |                  |                       |                 |                                               |                                     |                           |
|                                                                   |                                                                |                                     |        |                  |                       |                 |                                               |                                     |                           |

**PLEASE ANSWER THE FOLLOWING QUESTIONS ONLY FOR THE CAT YOU PRESENTED TO THE COMMUNITY PRACTICE CLINIC TODAY! If you are presenting more than one cat to the CPC today, please fill out the questionnaire for the youngest cat.**

**2. Scratching of inappropriate items**

**Did your cat scratch any items not designated for scratching (inappropriate items) since adopted? Please circle one answer.**

- A) No. → Please move on to section 3.
- B) Yes. → Please complete the following table.

**What inappropriate items (items not designed for scratching) has your cat scratched? Please fill out one line per each inappropriate item scratched by your cat.**

| <b>Type of scratching item</b>                                                                                                                                           | <b>Material of scratching item</b>                                                                        | <b>How is the surface your cat scratches mostly angled to the ground?</b>                                                          | <b>How often did your cat scratch this item?</b>                                                                          | <b>Why do you think your cat prefers this item?</b>                                                                                             |
|--------------------------------------------------------------------------------------------------------------------------------------------------------------------------|-----------------------------------------------------------------------------------------------------------|------------------------------------------------------------------------------------------------------------------------------------|---------------------------------------------------------------------------------------------------------------------------|-------------------------------------------------------------------------------------------------------------------------------------------------|
| A) sofa/s, chair/s, table/s or other furniture<br>B) carpet<br>C) wall/s or doorway/s<br>D) drapes, curtains or other hanging textile items<br>E) other (please specify) | A) cardboard<br>B) wood<br>C) carpet<br>D) leather<br>E) fabric<br>F) wicker<br>G) other (please specify) | A) vertical (e.g. the side of sofa)<br>B) horizontal (e.g. carpet)<br>C) angle to the ground (see laminated card for explanations) | A) At least once daily<br>B) More than once a week<br>C) Every 1-2 weeks<br>D) Every 3-4 weeks<br>E) Once a month or less | e.g.<br>- prefers the material<br>- long item<br>- was used by other cat before<br><i>Please note why you think your cat prefers this item.</i> |
| EXAMPLE<br>Ⓐ                                                                                                                                                             | Ⓓ                                                                                                         | Ⓐ                                                                                                                                  | Ⓑ                                                                                                                         | likes leather items for scratching                                                                                                              |
|                                                                                                                                                                          |                                                                                                           |                                                                                                                                    |                                                                                                                           |                                                                                                                                                 |
|                                                                                                                                                                          |                                                                                                           |                                                                                                                                    |                                                                                                                           |                                                                                                                                                 |
|                                                                                                                                                                          |                                                                                                           |                                                                                                                                    |                                                                                                                           |                                                                                                                                                 |
|                                                                                                                                                                          |                                                                                                           |                                                                                                                                    |                                                                                                                           |                                                                                                                                                 |
|                                                                                                                                                                          |                                                                                                           |                                                                                                                                    |                                                                                                                           |                                                                                                                                                 |
|                                                                                                                                                                          |                                                                                                           |                                                                                                                                    |                                                                                                                           |                                                                                                                                                 |

**What amount of damage was caused? Please consider all items you had to replace due to being damaged by scratching AND the loss in value of items you did not replace. (Please circle one answer.)**

A) More than 400 \$

B) 201-400 \$

C) 100-200\$

D) Less than 100 \$

**How did you try to stop your cat scratching inappropriate items? (Please check all that apply, even if what you attempted was not successful in interrupting the scratching behavior.)**

Yelled at cat when scratching

Sprayed water at cat when scratching

Spanked cat when scratching

Shook a rattle can or another device which makes an unpleasant sound at cat when scratching

Other interruption, please specify \_\_\_\_\_

Covered furniture with unattractive material, such as plastic or foil

Applied double sided tape or other sticky material to furniture

Removed furniture preferred for scratching from living space for awhile

Applied vinyl nail caps, such as Soft paws®, on my cat's nails

Bought designated scratching items

Placed designated scratching item next to inappropriate scratching item

Taught cat to use designated scratching items

None of the above

Other, please specify \_\_\_\_\_

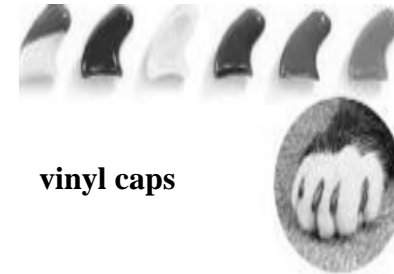

**vinyl caps**

**Who gave you advice on how to stop your cat from scratching inappropriate items? (Please check all that apply.)**

Veterinarian

Pet Shop employee

Books, TV, Internet

Cat breeder

Cat owners

None received

Other, please specify \_\_\_\_\_

### 3. Designated scratching items

The following section refers to the items your cat is supposed to scratch (designated scratching items).

Does your cat have any designated scratching items currently available? Please circle one answer.

A) No. → Please move on to section 4.

B) Yes. → Please complete the following table.

The following table refers to the items your cat is supposed to scratch (designated scratching items). Please list all items your cat has currently available. Please fill out one line per designated scratching item your cat has available.

| Type of scratching item<br>A) scratching post or pole<br>B) scratching pad<br>C) other (please specify)<br><br><i>Please see laminated card for explanations</i> | Material of scratching item<br>A) cardboard<br>B) wood<br>C) carpet<br>D) sisal fabric<br>E) sisal rope<br>F) burlap<br>G) fabric<br>H) other (please specify) | How is the surface of your cat's scratching item angled to the ground?<br>A) vertical<br>B) horizontal<br>C) angle to the ground<br><br><i>Please see laminated card for explanations</i> | What is the approximate length of the scratching item in inches? | How often does your cat use this scratching item?<br>A) At least once daily<br>B) More than once a week<br>C) Every 1-2 weeks<br>D) Every 3-4 weeks<br>E) Once a month or less | In which room is the scratching item located?<br>A) living or family room<br>B) bed room<br>C) guest room<br>D) hall way<br>E) kitchen<br>F) dining room<br>G) bathroom<br>H) other (please specify) | Why do you think your cat prefers this item?<br>e.g.<br>- prefers the material<br>- long item<br>- was used in conjunction with cat nip<br>- was used by other cat before<br>. . . |
|------------------------------------------------------------------------------------------------------------------------------------------------------------------|----------------------------------------------------------------------------------------------------------------------------------------------------------------|-------------------------------------------------------------------------------------------------------------------------------------------------------------------------------------------|------------------------------------------------------------------|--------------------------------------------------------------------------------------------------------------------------------------------------------------------------------|------------------------------------------------------------------------------------------------------------------------------------------------------------------------------------------------------|------------------------------------------------------------------------------------------------------------------------------------------------------------------------------------|
| EXAMPLE<br>Ⓐ                                                                                                                                                     | Ⓔ                                                                                                                                                              | Ⓐ                                                                                                                                                                                         | 40 inches                                                        | Ⓐ                                                                                                                                                                              | Ⓐ                                                                                                                                                                                                    | has a toy hanging from the top                                                                                                                                                     |
|                                                                                                                                                                  |                                                                                                                                                                |                                                                                                                                                                                           |                                                                  |                                                                                                                                                                                |                                                                                                                                                                                                      |                                                                                                                                                                                    |
|                                                                                                                                                                  |                                                                                                                                                                |                                                                                                                                                                                           |                                                                  |                                                                                                                                                                                |                                                                                                                                                                                                      |                                                                                                                                                                                    |
|                                                                                                                                                                  |                                                                                                                                                                |                                                                                                                                                                                           |                                                                  |                                                                                                                                                                                |                                                                                                                                                                                                      |                                                                                                                                                                                    |
|                                                                                                                                                                  |                                                                                                                                                                |                                                                                                                                                                                           |                                                                  |                                                                                                                                                                                |                                                                                                                                                                                                      |                                                                                                                                                                                    |
|                                                                                                                                                                  |                                                                                                                                                                |                                                                                                                                                                                           |                                                                  |                                                                                                                                                                                |                                                                                                                                                                                                      |                                                                                                                                                                                    |
|                                                                                                                                                                  |                                                                                                                                                                |                                                                                                                                                                                           |                                                                  |                                                                                                                                                                                |                                                                                                                                                                                                      |                                                                                                                                                                                    |
|                                                                                                                                                                  |                                                                                                                                                                |                                                                                                                                                                                           |                                                                  |                                                                                                                                                                                |                                                                                                                                                                                                      |                                                                                                                                                                                    |

**How did you teach your cat to use the scratching items? (Please check all that apply, even if what you attempted was not successful in teaching your cat to use the scratching items.)**

- No training
- Sprinkled catnip flakes over scratching items or used catnip spray
- Used Feliway Spray
- Praised him/her for scratching
- Gave him/her a treat for scratching
- Clicker training
- Put him/her near scratching area
- Took his/her front paws and scratched them over scratching post
- Tied a toy on scratching item
- Played with my cat and a toy near the scratching area
- Played with my cat in a way that he/she touched the scratching items with his/her paws during play
- Other, please specify \_\_\_\_\_

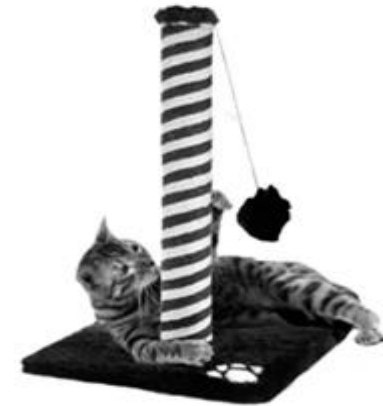

**Who gave you advice on how to teach your cat to scratch appropriate items? (Please check all that apply.)**

- |                                                      |                                            |                                              |
|------------------------------------------------------|--------------------------------------------|----------------------------------------------|
| <input type="checkbox"/> Veterinarian                | <input type="checkbox"/> Pet Shop employee | <input type="checkbox"/> Books, TV, Internet |
| <input type="checkbox"/> Cat breeder                 | <input type="checkbox"/> Cat owners        | <input type="checkbox"/> None received       |
| <input type="checkbox"/> Other, please specify _____ |                                            |                                              |

#### 4. Declawing

Please circle “Before” or “After” in the column that best describes your cat. The terms None, Mild, Moderate and Severe refer to how much damage or injury your cat has caused. If your cat is not declawed, please circle only the “Before” section of the table. If your cat is declawed, please circle the term that best describes your cat’s behavior the time before and after declaw surgery.

|                                               | None   | Mild   | Moderate | Severe |
|-----------------------------------------------|--------|--------|----------|--------|
| <b>Damage to furniture and household item</b> | Before | Before | Before   | Before |
|                                               | After  | After  | After    | After  |
| <b>Injury of people with claws</b>            | Before | Before | Before   | Before |
|                                               | After  | After  | After    | After  |
| <b>Injury of pets with claws</b>              | Before | Before | Before   | Before |
|                                               | After  | After  | After    | After  |

**Please check, if applicable:**

Someone living in my household has an increased risk for infections as a consequence of being scratched by my cat  
(e.g. immunosuppressed person, person suffering from Diabetes mellitus or other disease)

**If you (and not the previous owner) decided to have your cat declawed, please fill out the rest of this page. If your cat is not declawed, please continue on the next page (page 7).**

**I decided to have my cat declawed ...**

Please circle one box per row

|                                                                                                     |                                                                                                 |                                                                        |
|-----------------------------------------------------------------------------------------------------|-------------------------------------------------------------------------------------------------|------------------------------------------------------------------------|
| To prevent scratching of household items<br><u>BEFORE</u> my cat started to scratch household items | To stop scratching of household items<br><u>AFTER</u> my cat started to scratch household items | Scratching of household items was not a reason to have my cat declawed |
| To prevent injury of people by my cat’s claws<br><u>BEFORE</u> my cat started to injure people      | To stop injury of people by my cat’s claws<br><u>AFTER</u> my cat started to injure people      | Injury of people was not a reason to have my cat declawed              |
| To prevent injury of pets by my cat’s claws<br><u>BEFORE</u> my cat started to injure pets          | To stop injury of pets by my cat’s claws<br><u>AFTER</u> my cat started to injure pets          | Injury of pets was not a reason to have my cat declawed                |

I had my cat declawed for another reason. Please specify \_\_\_\_\_

**If declawing had not been available, what would you have done to solve the scratching problem? (Please circle one answer.)**

- A) Kept him/her in the household and allowed the scratching
- B) Not kept him/her in the household (Surrender to shelter, finding another home or euthanasia)
- C) Other (please write in what you would have done) \_\_\_\_\_

**If your cat is not declawed, please check all that apply.**

My cat is not declawed...

because he/she has not been destructive with his/her claws

because I could not afford the declaw surgery.

because my cat has access to the outdoors and therefore he/she needs his/her claws.

because I was concerned about adverse effects such as pain or postoperative complications.

because I feel that declawing a cat is wrong.

Other. Please specify\_\_\_\_\_

I might have him/her declawed in the future, if he/she scratches furniture, people or other pets.

I will not get him/her declawed in the future, even if he/she scratches furniture, people or other pets.

ANY OTHER COMMENTS?

---

---

---

---

**Thank you very much for your time and efforts!**

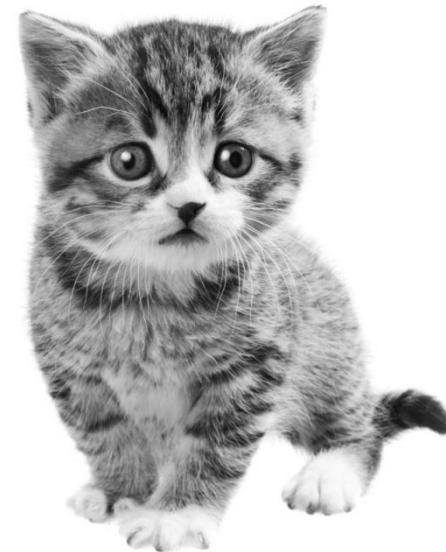

Supplement: sj-pdf-1-jfm-10.1177_1098612X17733185.pdf [file sj-pdf-1-jfm-10.1177_1098612X17733185.pdf]
